# Supplementary material
Source: MDPI journal article supplement (https://www.mdpi.com/2227-9717/8/12/1534)
Supplement: s1 [file s1]

**Supplementary Material for:**  
**Optimization of oxidative leaching for vanadium extraction  
from low-grade stone coal using response surface methodology**

ZUIV HUANG,<sup>1,4</sup> TAO CHEN,<sup>2,3</sup> YANG ZHOU,<sup>1,4</sup> HANZHI LIN,<sup>1,4</sup>  
WENBIN XU,<sup>5</sup> BO YAN,<sup>2,3</sup> XIANG DING,<sup>1</sup> and HUI TIAN<sup>1</sup>

1.—State Key Laboratory of Organic Geochemistry, Guangzhou Institute of Geochemistry, Chinese Academy of Sciences, Guangzhou, China 2.—SCNU Environmental Research Institute, Guangdong Provincial Key Laboratory of Chemical Pollution and Environmental Safety & MOE Key Laboratory of Theoretical Chemistry of Environment, South China Normal University, Guangzhou, China 3.— School of Environment, South China Normal University, University Town, Guangzhou, China 4.— University of Chinese Academy of Sciences, Beijing, China 5.— Dongjiang Environmental Company Limited, Shenzhen, China

\*Corresponding author: E-mail address: tao.chen@m.scnu.edu.cn (T.Chen)

**Table S-1. ANOVA for RSM model for leaching of V from stone coal.**

| <b>Model term</b>     | <b>Sum of squares</b> | <b>Df</b> | <b>Mean value</b> | <b>F-value</b> | <b>P-value</b> | <b>significance</b> |
|-----------------------|-----------------------|-----------|-------------------|----------------|----------------|---------------------|
| Model                 | 12006.81              | 8         | 1500.85           | 198.91         | <0.0001        | significant         |
| <i>A</i>              | 3008.32               | 1         | 3008.32           | 398.69         | <0.0001        |                     |
| <i>B</i>              | 6115.23               | 1         | 6115.23           | 810.45         | <0.0001        |                     |
| <i>C</i>              | 2248.47               | 1         | 2248.27           | 297.99         | <0.0001        |                     |
| <i>D</i>              | 134.9                 | 1         | 134.9             | 17.88          | 0.0004         |                     |
| <i>AB</i>             | 293.27                | 1         | 293.27            | 38.87          | <0.0001        |                     |
| <i>BC</i>             | 86.96                 | 1         | 86.96             | 11.52          | 0.0027         |                     |
| <i>A</i> <sup>2</sup> | 53.35                 | 1         | 53.35             | 7.07           | 0.0147         |                     |
| <i>C</i> <sup>2</sup> | 79.28                 | 1         | 79.28             | 10.51          | 0.0039         |                     |
| Residual              | 158.46                | 21        | 7.55              |                |                |                     |
| Lack of fit           | 145.95                | 16        | 9.12              | 3.65           | 0.0794         | not<br>significant  |
| Pure error            | 12.51                 | 5         | 2.5               |                |                |                     |
| Cor total             | 12165.26              | 29        |                   |                |                |                     |

$$R^2 = 0.9611 \quad R^2_{adj} = 0.9820$$

**Table S-2. CCD matrix and response values of four variables.**

| Run | A  | B  | C  | D  | H <sub>2</sub> SO <sub>4</sub> | Temperature | Time | MnO <sub>2</sub> | Leaching efficiency (%) |      |  |
|-----|----|----|----|----|--------------------------------|-------------|------|------------------|-------------------------|------|--|
|     |    |    |    |    | %                              | °C          | h    | %                | V                       | Fe   |  |
| 1   | -1 | -1 | -1 | -1 | 16                             | 70          | 4    | 1                | 16.1                    | 59.7 |  |
| 2   | 2  | 0  | 0  | 0  | 40                             | 80          | 6    | 2                | 71.3                    | 62.9 |  |
| 3   | -1 | -1 | 1  | -1 | 16                             | 70          | 8    | 1                | 27.3                    | 60.9 |  |
| 4   | -1 | 1  | 1  | -1 | 16                             | 90          | 8    | 1                | 57.1                    | 63.4 |  |
| 5   | -1 | -1 | -1 | 1  | 16                             | 70          | 4    | 3                | 17.9                    | 63.8 |  |
| 6   | 1  | -1 | 1  | 1  | 32                             | 70          | 8    | 3                | 44.8                    | 64   |  |
| 7   | 0  | 0  | 0  | 0  | 24                             | 80          | 6    | 2                | 50.9                    | 61.2 |  |
| 8   | 1  | 1  | -1 | 1  | 32                             | 90          | 4    | 3                | 70.0                    | 63.9 |  |
| 9   | 1  | -1 | 1  | -1 | 32                             | 70          | 8    | 1                | 40.8                    | 62.1 |  |
| 10  | 0  | 0  | 0  | 0  | 24                             | 80          | 6    | 2                | 51.4                    | 62.4 |  |
| 11  | -1 | -1 | 1  | 1  | 16                             | 70          | 8    | 3                | 30.9                    | 62   |  |
| 12  | 1  | 1  | -1 | -1 | 32                             | 90          | 4    | 1                | 62.1                    | 62.9 |  |
| 13  | 0  | 0  | 0  | 0  | 24                             | 80          | 6    | 2                | 48.9                    | 58.7 |  |
| 14  | 1  | -1 | -1 | 1  | 32                             | 70          | 4    | 3                | 31.4                    | 62.3 |  |
| 15  | 0  | 0  | 0  | 0  | 24                             | 80          | 6    | 2                | 51.7                    | 62.8 |  |
| 16  | -2 | 0  | 0  | 0  | 8                              | 80          | 6    | 2                | 22                      | 62.6 |  |
| 17  | 0  | 0  | 2  | 0  | 24                             | 80          | 10   | 2                | 68                      | 64.1 |  |
| 18  | 0  | -2 | 0  | 0  | 24                             | 60          | 6    | 2                | 22.9                    | 52.1 |  |
| 19  | 0  | 2  | 0  | 0  | 24                             | 100         | 6    | 2                | 84.3                    | 64   |  |
| 20  | 1  | 1  | 1  | -1 | 32                             | 90          | 8    | 1                | 86                      | 63.4 |  |
| 21  | -1 | 1  | -1 | -1 | 16                             | 90          | 4    | 1                | 33.6                    | 62.6 |  |
| 22  | 0  | 0  | 0  | 0  | 24                             | 80          | 6    | 2                | 48.2                    | 59.7 |  |
| 23  | 0  | 0  | 0  | 2  | 24                             | 80          | 6    | 4                | 54.7                    | 62.8 |  |
| 24  | 1  | -1 | -1 | -1 | 32                             | 70          | 4    | 1                | 26                      | 61.8 |  |
| 25  | 0  | 0  | 0  | -2 | 24                             | 80          | 6    | 0                | 42.6                    | 63.6 |  |

|    |    |   |    |   |    |    |   |   |      |      |
|----|----|---|----|---|----|----|---|---|------|------|
| 26 | 0  | 0 | -2 | 0 | 24 | 80 | 2 | 2 | 22.9 | 62.2 |
| 27 | 1  | 1 | 1  | 1 | 32 | 90 | 8 | 3 | 89.3 | 64.7 |
| 28 | -1 | 1 | 1  | 1 | 16 | 90 | 8 | 3 | 60.2 | 63.8 |
| 29 | -1 | 1 | -1 | 1 | 16 | 90 | 4 | 3 | 37.2 | 62   |
| 30 | 0  | 0 | 0  | 0 | 24 | 80 | 6 | 2 | 52   | 63.2 |

---
